# Supplementary material for: Synthesis and structure of [Na11(OtBu)10(OH)]:1H NMR shift of a hydroxide ion encapsulated in a 21-vertex alcoholate cage
Source: Royal Society of Chemistry journal article supplement (doi:10.1039/b308105b), 2003-01-01
Supplement: b308105b.doc [file b308105b.doc]

**Supporting Information**

Synthesis and structure of [Na11(OtBu)10(OH)]: 1H NMR shift of a hydroxide ion encapsulated in a 21-vertex alcoholate cage

Jens Geier and Hansjörg Grützmacher

Figure 1. Solid state 1H NMR of [Na11(OtBu)10(OH)] at 400MHz, rotation frequency: 10 kHz.

Figure 1 shows the 1H-MAS solid state spectrum of 1. The resonances of the different tBu groups and the signal of the OH unit are not resolved.

Figure 2. Plot of tBu (curve A) and OH (curve B) proton intensities [ln (I/I0)] versus the square of the field gradient G [a.u.].


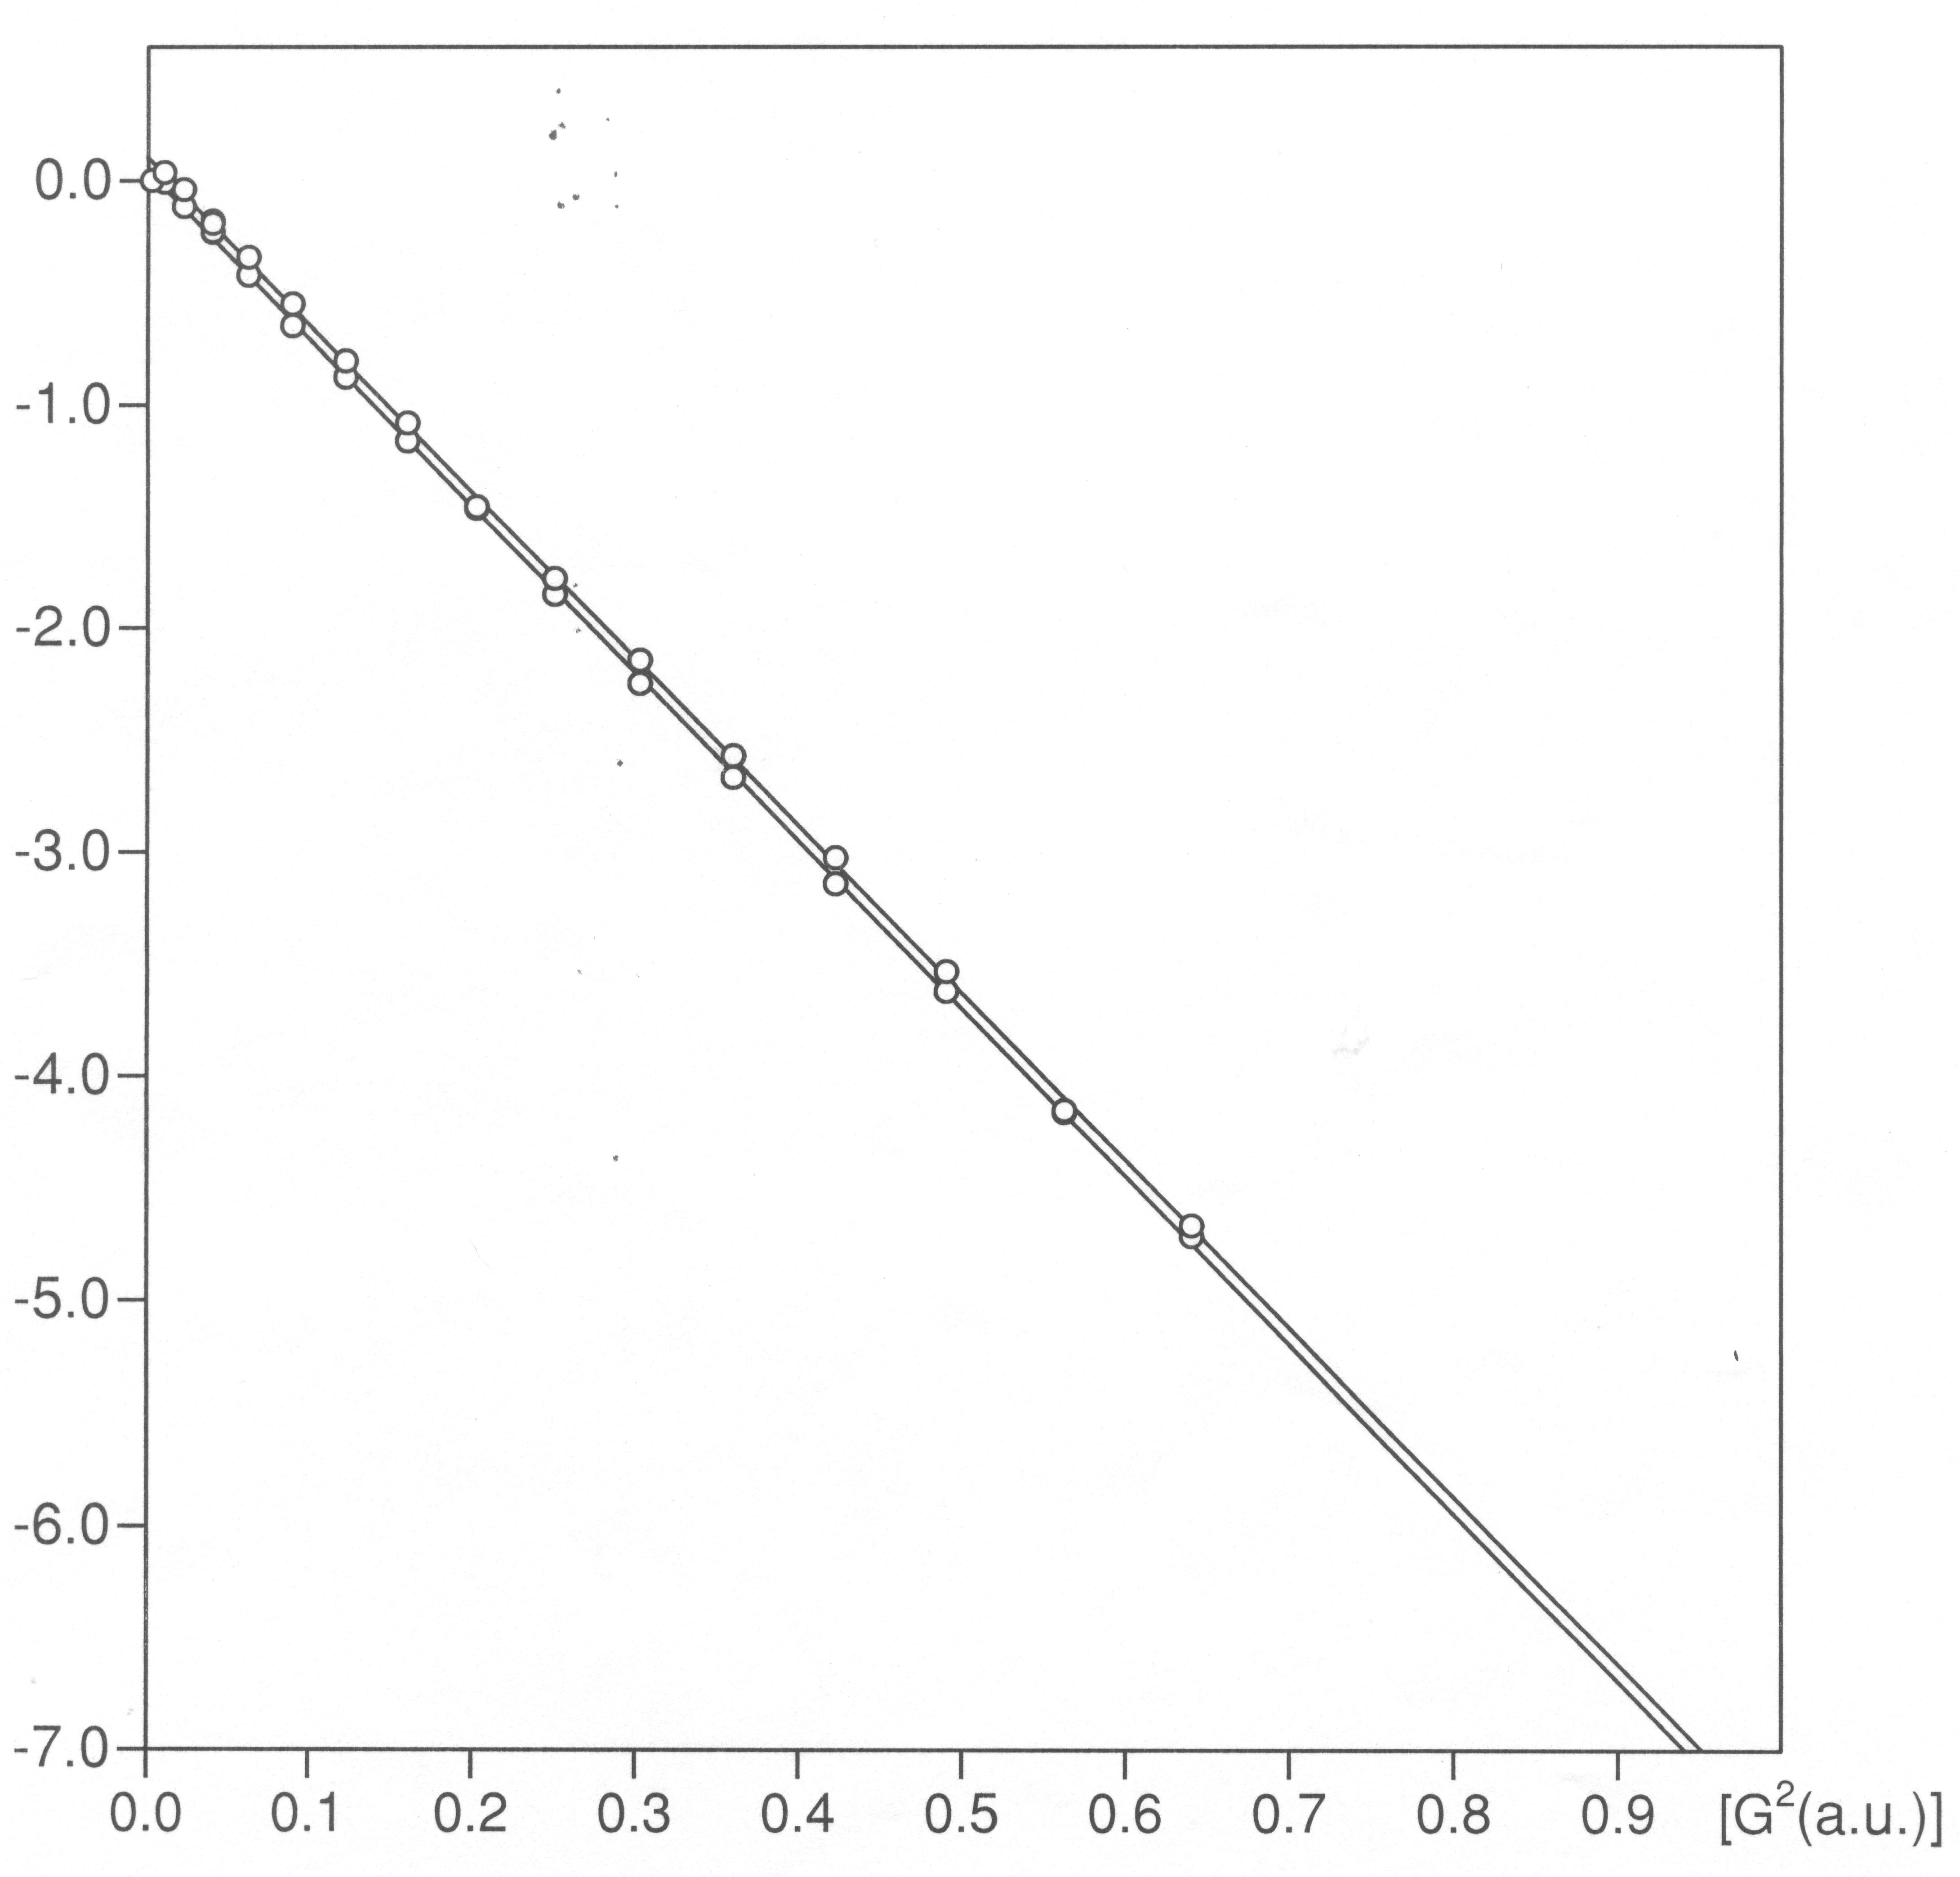


curve A (tBu)

curve B (OH)

Figure 2 shows a plot of the intensity [ln (I/I0)] of the tBu (curve A) and OH protons (curve B), respectively, versus the square of the field gradient G. Due to diffusion the intensities of the resonance signals decrease linearly with increasing field gradient strength. Note, that the slopes for both the tBu and OH resonances are strictly parallel [and the measured values fit well to the regression lines; correlation coefficient for curve A (tBu): 0.999929; correlation coefficient for curve B (OH): 0.999895], i.e. the diffusion coefficients are the same. In combination with the spherically approximated volume (calculated with the hydrodynamic radius obtained from the Stokes-Einstein-equation or from the x-ray structure, respectively) which is almost the same in solution and in the solid state, this results strongly support the idea that compound **1** retains its structure in solution.

Figure 3. Powder diffractograms of **1** prepared via methods A and B.

The experimental powder diffractograms of **1** prepared by two different methods A and B are displayed in Figure 3. In method A, a stoechiometric amount of water is added to solid NaOtBu. The resulting mixture is subsequently recrystallized from hot n-hexane containing 15 % (w/w) of N,N,N’,N’-tetramethyl-ethylendiamine (TMEDA). The resulting microcrystalline powder (35% yield) shows the powder diffractogram (room temp., CuKα1) on top of the Figure. In method B, NaOH was molten in a glass tube to give a thin film on the bottom. A clear solution of NaOtBu in a mixture of n-hexane/TMEDA (5:1 v/v) was stored under argon for about one week over the NaOH film at room temperature. Thereby colourless crystals formed in 10% yield above the remaining unreacted NaOH, which were subjected to single crystal diffraction measurements. From the structural data obtained thereby the theoretical powder diffractogram, shown on the bottom of Figure 3, was calculated. The agreement between both diffractograms is satisfying and clearly method A gives the same product, i.e. **1**, which is obtained in a smaller yield but with higher crystal quality than by method B.
